# Supplementary material
Source: HighWire-hosted journal article supplement (https://erj.ersjournals.com/content/55/4/1901855)
Supplement: inline-supplementary-material-1 [file inline-supplementary-material-1.pdf]

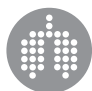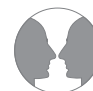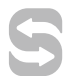

SHAREABLE PDF

# Blood monocyte counts as a potential prognostic marker for idiopathic pulmonary fibrosis: analysis from the Australian IPF registry

Alan K.Y. Teoh<sup>1,2,3</sup>, Helen E. Jo<sup>1,2,3</sup>, Daniel C. Chambers<sup>3,4,5</sup>, Karen Symons<sup>6</sup>, Eugene H. Walters<sup>3,7</sup>, Nicole S. Goh<sup>3,8</sup>, Ian Glaspole<sup>3,9</sup>, Wendy Cooper<sup>1,2</sup>, Paul Reynolds<sup>3,10</sup>, Yuben Moodley<sup>3,11</sup> and Tamera J. Corte<sup>1,2,3</sup>

**Affiliations:** <sup>1</sup>Royal Prince Alfred Hospital, Camperdown, Australia. <sup>2</sup>University of Sydney, Sydney, Australia. <sup>3</sup>Centre of Research Excellence in Pulmonary Fibrosis, Camperdown, Australia. <sup>4</sup>The Prince Charles Hospital, Brisbane, Australia. <sup>5</sup>University of Queensland, Brisbane, Australia. <sup>6</sup>Lung Foundation Australia, Milton, Australia. <sup>7</sup>University of Tasmania, Hobart, Australia. <sup>8</sup>The Austin Hospital, Heidelberg, Australia. <sup>9</sup>The Alfred Hospital, Melbourne, Australia. <sup>10</sup>Royal Adelaide Hospital, Adelaide, Australia. <sup>11</sup>Fiona Stanley Hospital, Murdoch, Australia.

**Correspondence:** Alan K.Y. Teoh, Royal Prince Alfred Hospital, Dept of Respiratory and Sleep Medicine, 50 Missenden Road, Camperdown, New South Wales 2050, Australia. E-mail: alan\_tky@yahoo.com

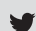

@ERSpublications

**Blood monocytes have been recently proposed as a potential prognostic marker for IPF. Data from the Australian IPF registry have shown that elevated monocytes, neutrophils and total leukocytes significantly predict poorer survival in IPF patients.** <http://bit.ly/38GP7f0>

**Cite this article as:** Teoh AKY, Jo HE, Chambers DC, *et al.* Blood monocyte counts as a potential prognostic marker for idiopathic pulmonary fibrosis: analysis from the Australian IPF registry. *Eur Respir J* 2020; 55: 1901855 [https://doi.org/10.1183/13993003.01855-2019].

This single-page version can be shared freely online.

## To the Editor:

Idiopathic pulmonary fibrosis (IPF) is a chronic, progressive, fibrosing lung disease that leads to unrelenting dyspnoea and chronic cough, and ultimately respiratory failure [1]. IPF is characterised by a variable disease course that remains difficult to predict for an individual at diagnosis [2]. In the current era, with the advent of anti-fibrotic therapy which can slow disease progression, it is increasingly important to identify patients with early disease and to target those patients who are at most risk of rapid decline [3]. However, despite multiple studies proposing novel potential prognostic biomarkers, the current American Thoracic Society/European Respiratory Society/Japanese Respiratory Society/Latin American Thoracic Society guideline statements dismissed the use of these biomarkers except in a research capacity [3, 4].
